# Supplementary material
Source: PubMed Central journal article supplement (PMC1472499)

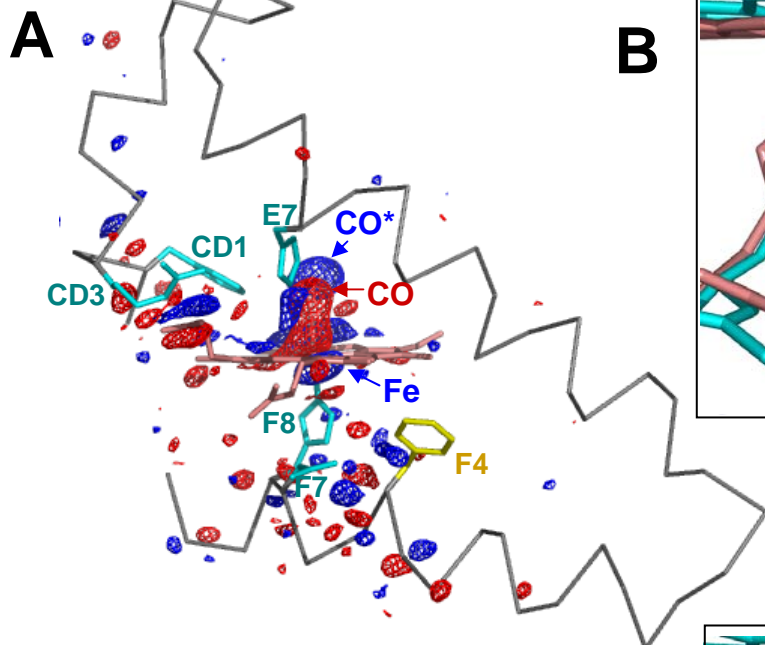

**B**

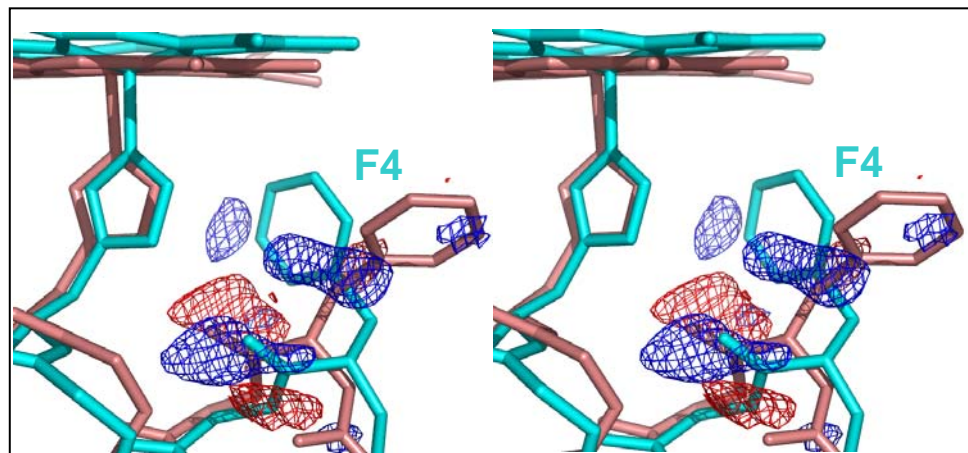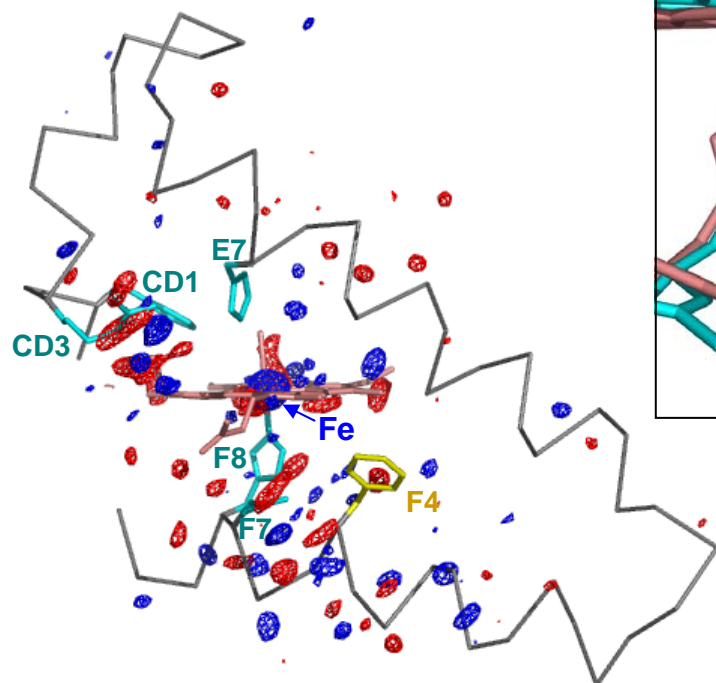

**Subunit B**

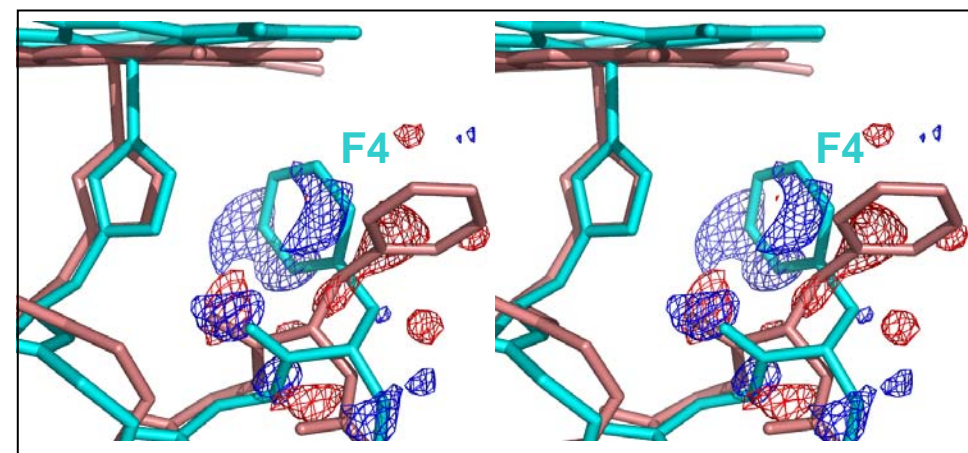

Supplement: pnas_0509411103_2.pdf [file pnas_0509411103_2.pdf]
